# Supplementary material for: Quantum transport and fractional hall effect in Moiré correlated/anticorrelated interface channels
Source: Royal Society of Chemistry journal article supplement (doi:10.1039/d3tc02222f), 2023-01-01
Supplement: d3tc02222f1.pdf [file d3tc02222f1.pdf]

## Supporting Information for

### Quantum Transport and Fractional Hall Effect in Moiré Correlated/Anticorrelated Interface Channels

Farzaneh Shayeganfar<sup>1,2\*</sup>, Ali Ramazani<sup>3†</sup>

<sup>1</sup>Department of Physics and Energy Engineering, Amirkabir University of Technology, Tehran

<sup>2</sup>Department of Aerospace Engineering, University of Michigan, Ann Arbor, Michigan 10485, USA

<sup>3</sup>Department of Mechanical Engineering, Massachusetts Institute of Technology, Cambridge, MA 02139,  
USA

---

\* fshayega@umich.edu

† ramazani@mit.edu

## S1. Twisted armchair circular graphene nanoribbon band structures

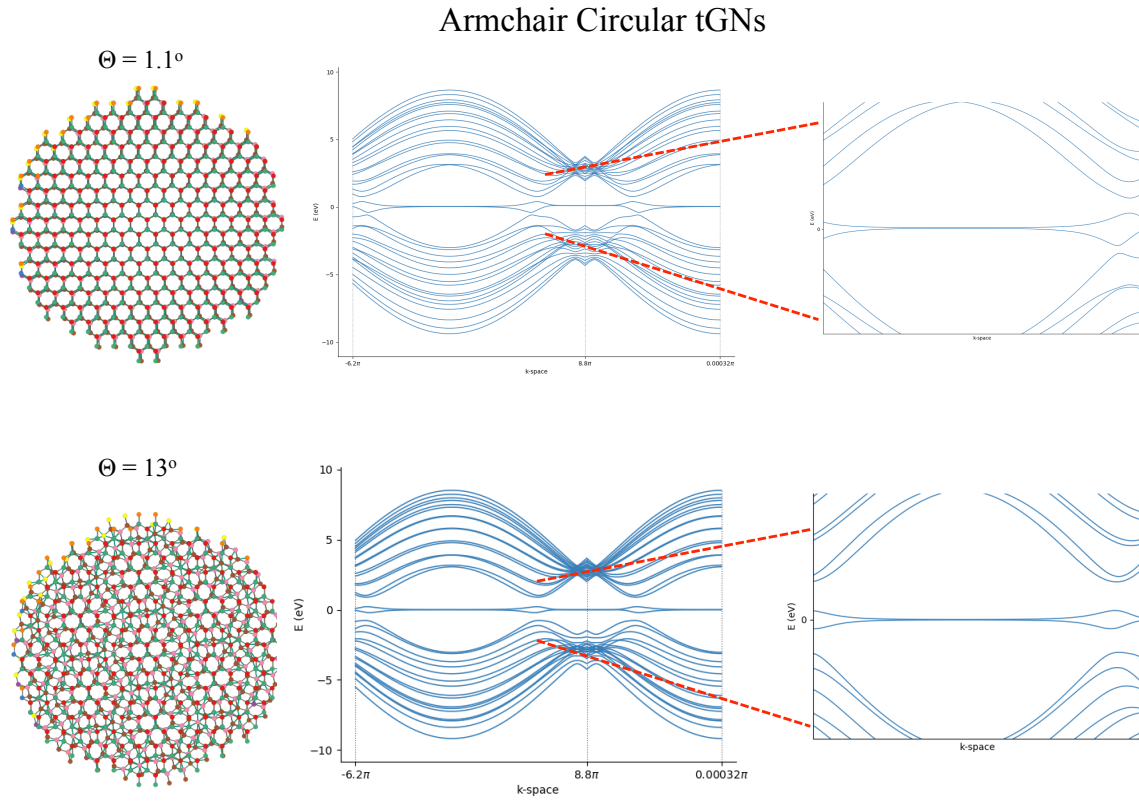

**Fig. S1:** Moiré pattern generated by rotation of two armchair circular graphene nanoribbons by magic angle  $\theta = 1.1^\circ$  and  $\theta = 13^\circ$ . Band structure of armchair circular tGNs for magic angle  $\theta = 1.1^\circ$  and  $\theta = 13^\circ$ .

## S2. Twisted armchair rectangular graphene nanoribbon band structures

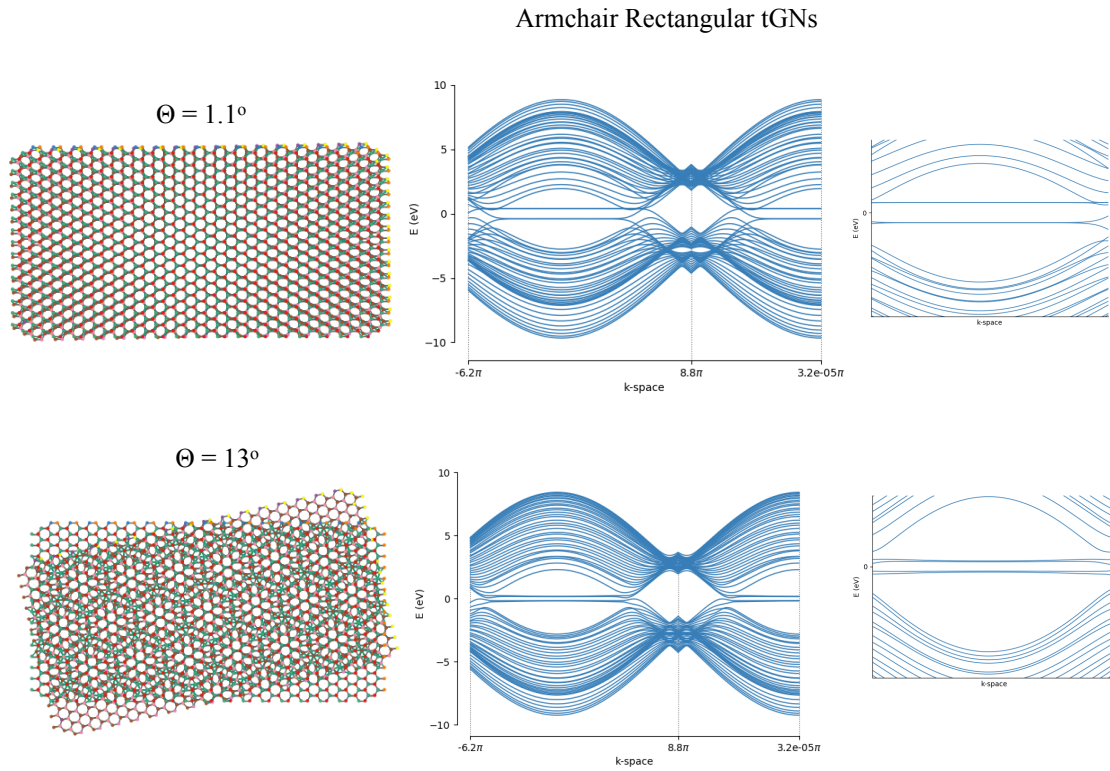

**Fig. S2:** Moiré pattern generated by rotation of two armchair rectangular graphene nanoribbons by magic angle  $\theta = 1.1^\circ$  and  $\theta = 13^\circ$ . Band structure of armchair rectangular tGNs for magic angle  $\theta = 1.1^\circ$  and  $\theta = 13^\circ$ .

### S3. Local density of states and transmission of twisted armchair circular graphene nanoribbon

Armchair Circular tGNs

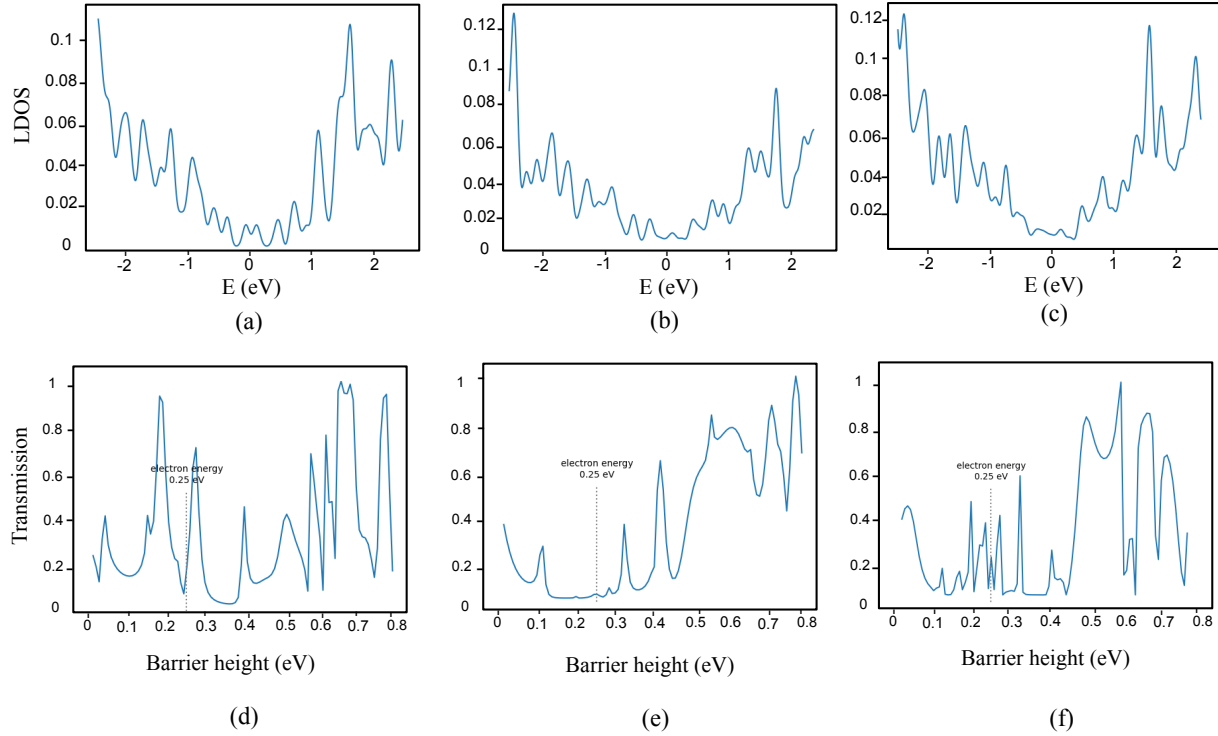

**Fig. S3:** LDOS (a-c) and electron transmission (d-f) of armchair circular tGNs at magic angle  $\theta = 1.1^\circ$  and  $\theta = 13^\circ$  and  $\theta = 21.79^\circ$ .

## S4. Local density of states and transmission of twisted armchair rectangular graphene nanoribbons

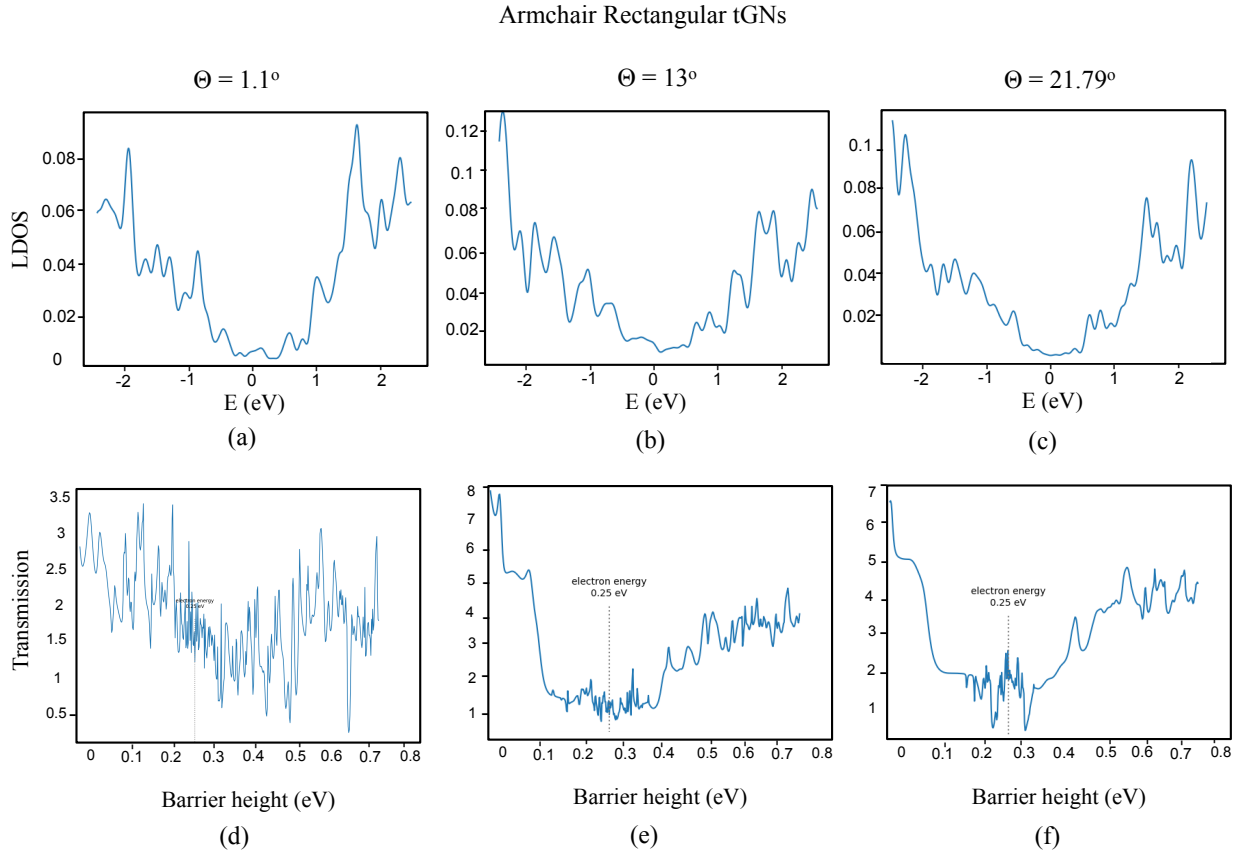

**Fig. S4:** LDOS (a-c) and electron transmission (d-f) of armchair rectangular tGNs at magic angle  $\theta = 1.1^\circ$  and  $\theta = 13^\circ$  and  $\theta = 21.79^\circ$ .

## S5. Size Effect on Transmission of homo-twisted structures

### Armchair Rectangular tGNs

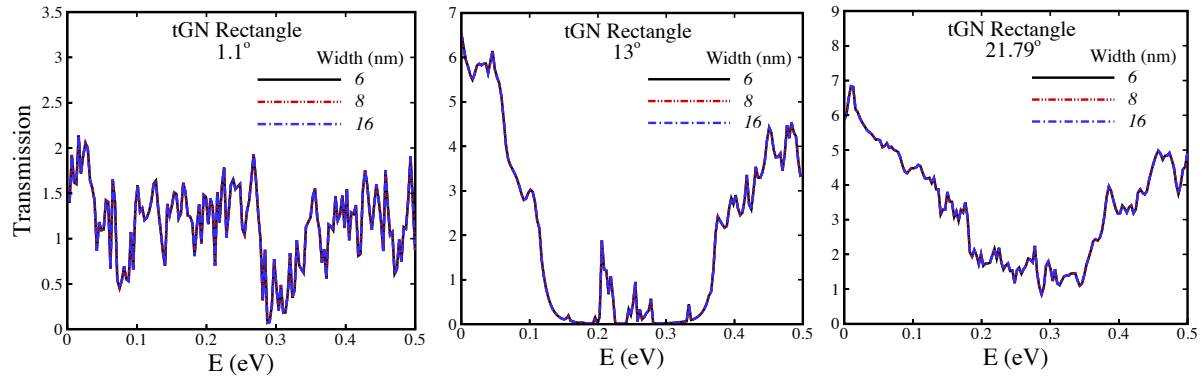

**Fig. S5:** Transmission of twisted armchair homostructure tGN (a-c) for different width at angle  $\theta = 1.1^\circ$  and  $\theta = 13^\circ$  and  $\theta = 21.79^\circ$ .

## S6. Size effect on Hall effect of homo-twisted structures

### Armchair Rectangular tGNs

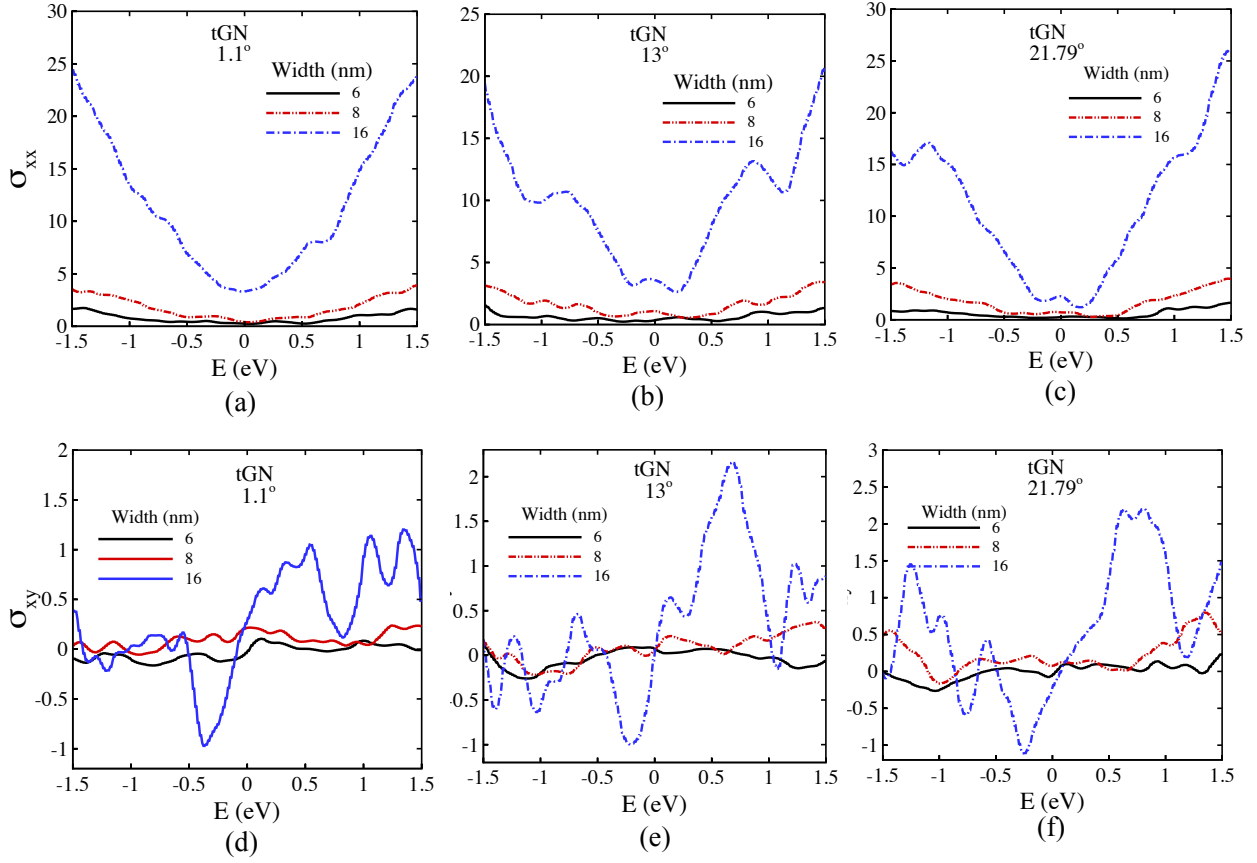

**Fig. S6:** Quantum Hall effect for different width of twisted heterostructure of armchair rectangular thGN; (a-c) the longitudinal conductivity  $\sigma_{xx}$  and (d-f) Hall conductivity  $\sigma_{xy}$  at field ( $B = 40$  T) and at  $\theta = 1.1^\circ$  and  $\theta = 13^\circ$  and  $\theta = 21.79^\circ$ .
